# Supplementary material for: FGF/MAPK/Ets signaling renders pigment cell precursors competent to respond to Wnt signal by directly controllingCi-Tcftranscription
Source: Oxford University Press journal article supplement (doi:10.1242/dev.057323), 2011-03-08
Supplement: dev057323tables1.pdf [file dev057323tables1.pdf]

**Table S1. Oligonucleotides used to prepare constructs for transgenesis**

| Name             | Sequence                                       |
|------------------|------------------------------------------------|
| Ci-ptyrpF        | GCCTAATTGTGTCTGATAAGAAAATAATAGG                |
| Ci-ptyrpR        | AGTAAGCGGTTAGCGATTGTAGTCGTCG                   |
| Ci-ptyrF         | GCTTGCCTTTTGAGAATTACCAGTTCCTAT                 |
| Ci-ptyrR         | CGGTCAAGTACACTGTAAACACTGTTAAA                  |
| mCheF            | ATGGTGAGCAAGGGCGAGGAGGACA                      |
| mCheR            | CCGGTACTTGTACAGCTCGTCCATGCC                    |
| FGFRDNFw         | AATGATACAACACAAAATACGTTT                       |
| FGFRDNRev        | AATTCGTTCCCGAACAACATCACCGGCTC                  |
| mCheFw           | CGCCGTGAGCAAGGGCGAGGAGGATAAC                   |
| N1F              | CACC <b>ATG</b> TACGATGTTCCGGCAAAAGTA          |
| N1R              | GCTGATGTTGCACGGCGG                             |
| S $\beta$ catFw  | ATAGCGGCCGCACC <b>ATG</b> AACTCCCCGATACAAACCAA |
| S $\beta$ catRev | ATCGGATCCAAGTCAGTATCGAGCCATGGTTG               |
