# Supplementary material for: FGF/MAPK/Ets signaling renders pigment cell precursors competent to respond to Wnt signal by directly controllingCi-Tcftranscription
Source: Oxford University Press journal article supplement (doi:10.1242/dev.057323), 2011-03-08
Supplement: dev057323tables2.pdf [file dev057323tables2.pdf]

**Table S2. Oligonucleotides used to amplify *ptcf* regulatory region fragments**

| Name  | Oligonucleotide sequence*              |
|-------|----------------------------------------|
| ptcf1 | ATTCgaattcCTTAAACCTGTATTAGTGTATCAACCA  |
| ptcf9 | TATAgattcGCGCTGTTATGCGATCAAACTATCTACCG |
| cf0.4 | TTCAgattcAATCCGGCTTAAAAGAAACAG         |
| cr0.4 | AAATgattcTCTGTACTGAAACAGCTC            |
| c2    | GTAAgattcGGGATTTATTTGATT               |
| c2r   | TTTAgattcCTTCCTATTGCAATAT              |

\*EcoRI restriction endonuclease site in lowercase letters.
