# Supplementary material for: FGF/MAPK/Ets signaling renders pigment cell precursors competent to respond to Wnt signal by directly controllingCi-Tcftranscription
Source: Oxford University Press journal article supplement (doi:10.1242/dev.057323), 2011-03-08
Supplement: dev057323tables3.pdf [file dev057323tables3.pdf]

**Table S3. Oligonucleotides used in site direct mutagenesis and EMSA assay**

| Name   | Sequence*                                              |
|--------|--------------------------------------------------------|
| Mut1AS | GTTAATACTGTTTCTTTAAGCC <b>AGAA</b> TTTAATGCAATGTGACTGC |
| Mut1S  | GCAGTCACATTGCATTAAAT <b>CT</b> GGCTTAAAAGAAACAGTATTAAC |
| Mut2AS | ACCAGCTAGCCAACC <b>AGAAA</b> ACGAAATCTG                |
| Mut2S  | CAGATTCGTT <b>TTCT</b> GGTTGGCTAGCTGGT                 |
| Mut3AS | GCGTTTATTCT <b>TTCT</b> TATTGCAATATTGC                 |
| Mut3S  | GCAATATTGCAAATA <b>AGAAA</b> AGAATAAACGC               |
| Mut4AS | GACTGATGACCCAA <b>TTCT</b> GTGCGAATAAAGCCAATA          |
| Mut4S  | TATTGGCTTTATTCGCAC <b>AGAA</b> TTGGGGTCATCAGTC         |
| Wt2S   | CAGATTCGTT <b>TTCC</b> GTGGCTAGCTGGT                   |
| Wt2AS  | ACCAGCTAGCCAACC <b>AGAAA</b> ACGAAATCTG                |

\*ETS BS GGAA, underlined. Mutated nucleotides are indicated in bold.
