# Supplementary figures and images for: FGF/MAPK/Ets signaling renders pigment cell precursors competent to respond to Wnt signal by directly controllingCi-Tcftranscription
Source: Oxford University Press journal article supplement (doi:10.1242/dev.057323), 2011-03-08

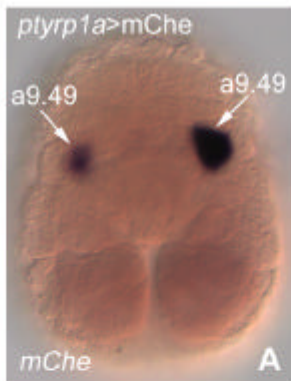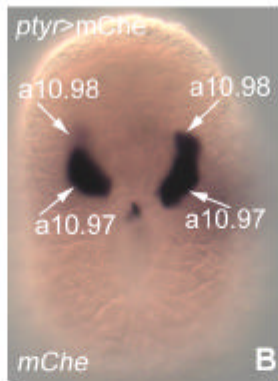

Supplement: dev057323figs1.pdf [file dev057323figs1.pdf]

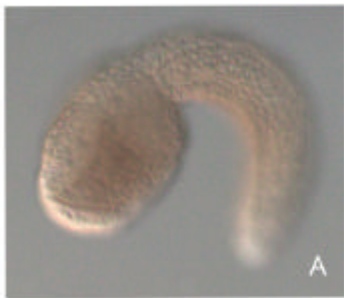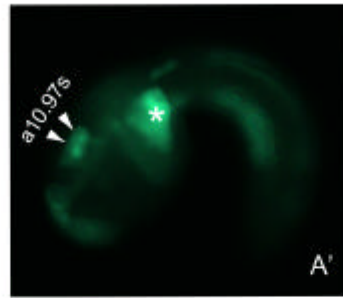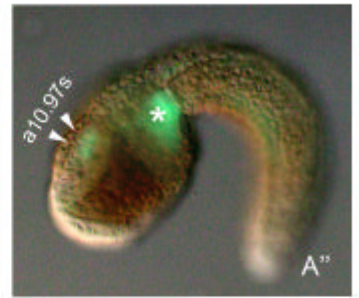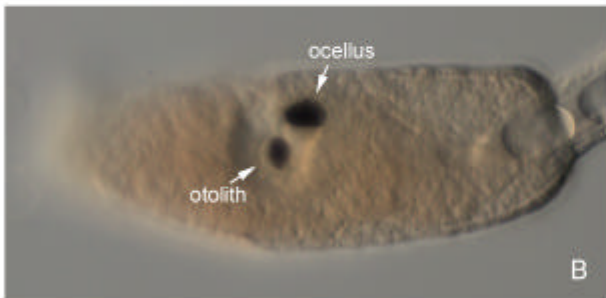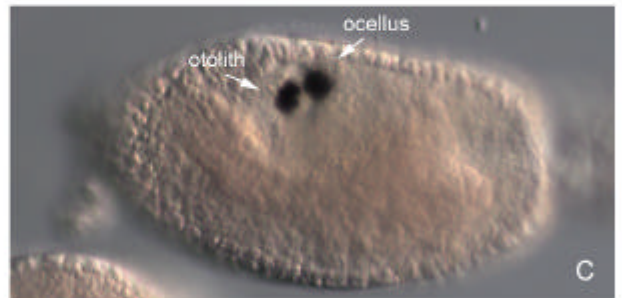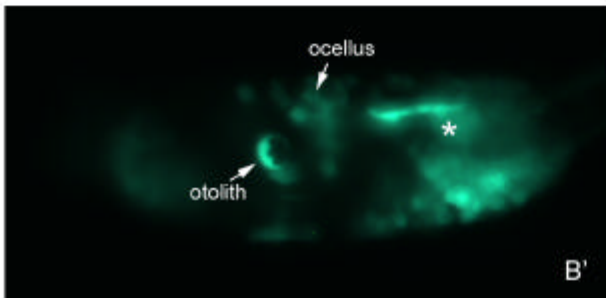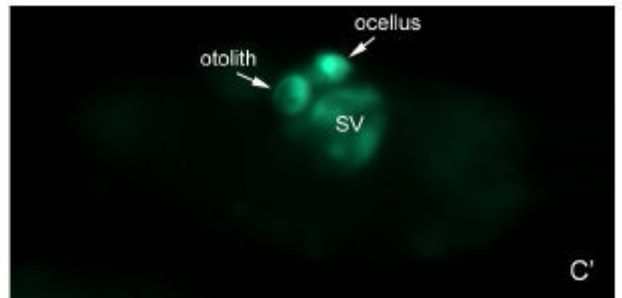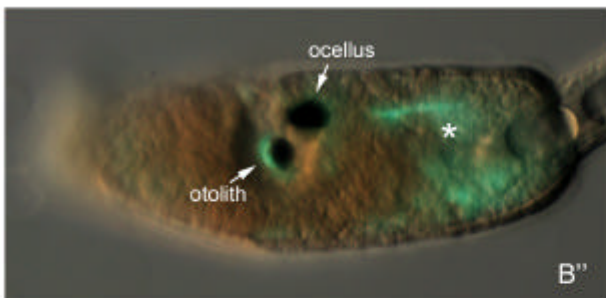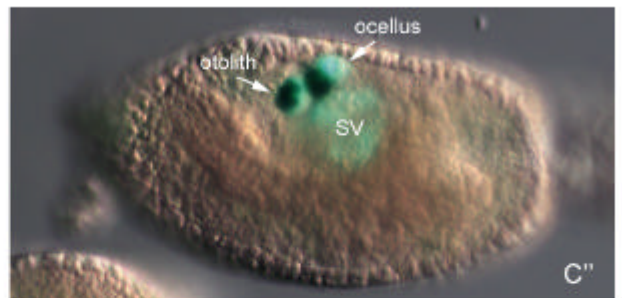

Supplement: dev057323figs2.pdf [file dev057323figs2.pdf]
